# Supplementary material
Source: publisher figshare collection journal article supplement (https://acs.figshare.com/ndownloader/files/17566727)
Supplement: Supplementary file 1 [file 17566727]

## Sheet: Sheet1
S4 table. Detailed primer sequence information of the dCAPS marker
Primer name	Primer sequence(5'-3')
dCAPS-up	ACCAGGCCAAGATCAAGACAAGAAT
dCAPS-down	TCGGAACAATAGCACTACTAACGGT
Note: The red bases are the introduced mutant bases

## Sheet: Sheet2
15年编号	测序编号
15G001	1			1
15G002	2			2
15G004	4			4
15G005	5			5
15G006	6			6
15G007	7			8
15G008	8			11
15G009	9			12
15G010	10			13
15G011	11			14
15G012	12			17
15G013	13			18
15G014	14			21
15G015	15			22
15G016	16			23
15G017	17			24
15G018	18			25
15G019	19			26
15G020	20			27
15G021	21			29
15G022	22			30
15G023	23			31
15G024	24			32
15G025	25			35
15G026	26			36
15G027	27			37
15G028	28			39
15G029	29			41
15G030	30			42
15G031	31			43
15G032	32			45
15G034	34			47
15G035	35			48
15G036	36			49
15G037	37			51
15G038	38			52
15G039	39			53
15G040	40			55
15G041	41			56
15G042	42			57
15G043	43			58
15G044	44			59
15G045	45			60
15G046	46			61
15G047	47			63
15G048	48			64
15G049	49			66
15G050	50			67
15G051	51			69
15G052	52			71
15G053	53			72
15G055	55			73
15G056	56			74
15G057	57			75
15G058	58			76
15G059	59			77
15G060	60			80
15G061	61			81
15G062	62			83
15G063	63			84
15G064	64			86
15G066	66			89
15G067	67			90
15G068	68			91
15G069	69			92
15G070	70			93
15G071	71			94
15G072	72			95
15G073	73			97
15G074	74			99
15G075	75			102
15G076	76			103
15G077	77			104
15G078	78			105
15G080	80			107
15G081	81			109
15G083	83			111
15G084	84			113
15G085	85			114
15G086	86			118
15G087	87			121
15G088	88			123
15G089	89			125
15G090	90			127
15G091	91			128
15G092	92			129
15G093	93			130
15G094	94			131
15G095	95			133
15G096	96			138
15G097	97			140
15G098	98			142
15G099	99			144
15G100	100			146
15G101	101			147
15G102	102			149
15G103	103			150
15G104	104			151
15G105	105			152
15G106	106			153
15G107	107			156
15G108	108			157
15G109	109			159
15G110	110			160
15G111	111			161
15G112	112			162
15G113	113			163
15G114	114			164
15G115	115			165
15G116	116			166
15G117	117			168
15G118	118			169
15G120	120			170
15G121	121			171
15G122	122			172
15G123	123			174
15G124	124			175
15G125	125			176
15G126	126			178
15G127	127			179
15G128	128			180
15G129	129			182
15G130	130			183
15G131	131			184
15G132	132			186
15G133	133			187
15G134	134			188
15G135	135			189
15G136	136			190
15G137	137			191
15G138	138			193
15G139	139			194
15G140	140			195
15G141	141			196
15G142	142			197
15G143	143			198
15G144	144			199
15G145	145			200
15G146	146			202
15G147	147			203
15G148	148			204
15G149	149			205
15G150	150			206
15G151	151			207
15G152	152			208
15G153	153			209
15G154	154			211
15G155	155			212
15G156	156			214
15G157	157			215
15G158	158			217
15G159	159			219
15G160	160			220
15G161	161			221
15G162	162			222
15G163	163			223
15G164	164			224
15G165	165			226
15G166	166			227
15G167	167			228
15G168	168			229
15G169	169			230
15G170	170			231
15G171	171			232
15G172	172			234
15G173	173			235
15G174	174			236
15G175	175			237
15G176	176			238
15G178	178			239
15G179	179			240
15G180	180			241
15G181	181			242
15G182	182			243
15G183	183			244
15G184	184			245
15G186	186			246
15G187	187			247
15G188	188			249
15G189	189			250
15G190	190			252
15G191	191			253
15G193	193			254
15G194	194			255
15G195	195			256
15G196	196			257
15G197	197			258
15G198	198			259
15G199	199			261
15G200	200			262
15G201	201			268
15G202	202			269
15G203	203			271
15G204	204			272
15G205	205			275
15G206	206			276
15G207	207			277
15G208	208			279
15G209	209			280
15G210	210			281
15G211	211			282
15G212	212			283
15G213	213			284
15G214	214			285
15G215	215			287
15G216	216			288
15G217	217			289
15G218	218			290
15G219	219			291
15G220	220			292
15G221	221			293
15G222	222			294
15G223	223			297
15G224	224			298
15G225	225			299
15G226	226			300
15G227	227			65
15G228	228			54
15G229	229			267
15G230	230			79
15G231	231			33
15G232	232			177
15G233	233			3
15G234	234			185
15G235	235			192
15G236	236			82
15G237	237			119
15G238	238			7
15G239	239			9
15G240	240			10
15G241	241			15
15G242	242			16
15G243	243			19
15G244	244			20
15G245	245			34
15G246	246			38
15G247	247			40
15G248	248			44
15G249	249			46
15G250	250			50
15G251	251			62
15G252	252			68
15G253	253			70
15G254	254			78
15G255	255			85
15G256	256			87
15G257	257			88
15G258	258			96
15G259	259			98
15G260	260			101
15G261	261			106
15G262	262			108
15G263	263			110
15G264	264			112
15G265	265			115
15G266	266			116
15G268	268			117
15G269	269			120
15G270	270			122
15G271	271			126
15G272	272			132
15G273	273			134
15G274	274			135
15G275	275			136
15G276	276			137
15G277	277			139
15g278	278			141
15G279	279			143
15G280	280			145
15G281	281			148
15G282	282			154
15G283	283			155
15G284	284			158
15G285	285			167
15G286	286			173
15G287	287			181
15G288	288			201
15G289	289			210
15G290	290			213
15G291	291			218
15G292	292			225
15G293	293			233
15G294	294			248
15G295	295			260
15G296	296			263
15G297	297			264
15G298	298			265
15G299	299			266
15G300	300			270
15G065	14G002	65		273
15G054	14G092	54		274
15G267	14G100	267		278
15G079	14G136	79		286
15G033	14G137	33		296
15G177	14G186	177		295
15G003	14G211	3		28
15G185	14G235	185		251
15G192	14G242	192		124
15G082	14G270	82		100
15G119	14G288	119		216
